# Supplementary material
Source: PubMed Central journal article supplement (PMC1305025)
Supplement: biophysj_104.048207_1.pdf [file biophysj_104.048207_1.pdf]

# Supporting Information

Farnesyltransferase - New Insights into the Zinc-Coordination Sphere

Paradigm: Evidence for a Carboxylate-Shift Mechanism

*Sérgio F. Sousa, Pedro A. Fernandes, and Maria João Ramos\**

*REQUIMTE*, Departamento de Química, Faculdade de Ciências da Universidade do

Porto, Rua do Campo Alegre, 687, 4169-007 Porto, Portugal

\* E-mail: [mjramos@fc.up.pt](mailto:mjramos@fc.up.pt)

## CRYSTALLOGRAPHIC STRUCTURES – FTASE

Distances between the Zinc Atom and the second

Carboxylate oxygen from Asp297 $\beta$  (Zn-O<sub>b</sub>)

(Structures with resolution > 2.50 Å not considered in the analysis – marked in red)

### 1. FTase Resting State (1 Zinc Thiolate Bond)

|   | PDB Code | Res. (Å) | Year | Distance Zn-O <sub>b</sub> <sup>i</sup> (Å) | Other Possible Zinc Ligands <sup>ii</sup> / Distance (Å) | FTase Ligands |
|---|----------|----------|------|---------------------------------------------|----------------------------------------------------------|---------------|
| 1 | 1FT1     | 2.25     | 1997 | 2.56                                        | H <sub>2</sub> O / 2.70                                  | -             |

|                                     |      |
|-------------------------------------|------|
| Average Value Zn-O <sub>b</sub> (Å) | 2.56 |
|-------------------------------------|------|

## 2. FTase Binary Complex (1 Zinc Thiolate Bond)

|   | PDB Code | Res. (Å) | Year | Distance Zn-O <sub>b</sub> (Å) | Other Possible Zinc Ligands / Distance (Å) | FTase Ligands      |
|---|----------|----------|------|--------------------------------|--------------------------------------------|--------------------|
| 1 | 1FPP     | 2.75     | 1998 | 2.03                           | -                                          | FPP <sup>iii</sup> |
| 2 | 1FT2     | 3.40     | 1998 | 3.05                           | -                                          | FPP                |
| 3 | 1O1R     | 2.30     | 2003 | 2.35                           | H <sub>2</sub> O / 2.56                    | GGPP <sup>iv</sup> |
| 4 | 1O1S     | 2.30     | 2003 | 2.42                           | H <sub>2</sub> O / 2.18                    | 1NH <sup>v</sup>   |

|                                     |      |
|-------------------------------------|------|
| Average Value Zn-O <sub>b</sub> (Å) | 2.39 |
|-------------------------------------|------|

## 3. FTase Ternary Complex (2 Zinc Thiolate Bonds)

|   | PDB Code | Res. (Å) | Year | Distance Zn-O <sub>b</sub> (Å) | Other Possible Zinc Ligands / Distance (Å) | FTase Ligands                    |
|---|----------|----------|------|--------------------------------|--------------------------------------------|----------------------------------|
| 1 | 1QBQ     | 2.40     | 1999 | 2.45                           | S (Cys) / 2.48                             | HFP <sup>vi</sup> + CVIM         |
| 2 | 1D8D     | 2.00     | 2000 | 2.61                           | S (Cys) / 2.40                             | FII <sup>vii</sup> + KKKSSTKCVIM |
| 3 | 1JCR     | 2.00     | 2001 | 2.53                           | S (Cys) / 2.41                             | FPP + CVFM                       |
| 4 | 1JCS     | 2.20     | 2001 | 2.55                           | S (Cys) / 2.35                             | FII + TKCVFM                     |

|                                     |      |
|-------------------------------------|------|
| Average Value Zn-O <sub>b</sub> (Å) | 2.54 |
|-------------------------------------|------|

## 4. FTase Ternary Complex (1 Zinc Thiolate Bond)

|   | PDB Code | Res. (Å) | Year | Distance Zn-O <sub>b</sub> (Å) | Other Possible Zinc Ligands / Distance (Å) | FTase Ligands                   |
|---|----------|----------|------|--------------------------------|--------------------------------------------|---------------------------------|
| 1 | 1JCQ     | 2.30     | 2001 | 2.67                           | Sc (L-739) / 2.36                          | FPP + L-739,750 <sup>viii</sup> |
| 2 | 1LD7     | 2.00     | 2002 | 2.61                           | N (U49) / 2.07                             | FPP + U66 <sup>ix</sup>         |
| 3 | 1LD8     | 1.80     | 2002 | 2.53                           | N (U49) / 1.97                             | FPP + U49 <sup>x</sup>          |
| 4 | 1MZC     | 2.00     | 2002 | 2.55                           | N (BNE) / 1.93                             | FPP + BNE <sup>xi</sup>         |

|    |      |      |      |      |                         |                                |
|----|------|------|------|------|-------------------------|--------------------------------|
| 5  | 1N94 | 3.50 | 2002 | 2.77 | -                       | HFP + TIN <sup>xii</sup>       |
| 6  | 1N95 | 2.30 | 2002 | 2.41 | N (FTH) / 2.70          | HFP + FTH <sup>xiii</sup>      |
| 7  | 1N9A | 3.20 | 2002 | 2.44 | -                       | HFP + FTI <sup>xiv</sup>       |
| 8  | 1NI1 | 2.30 | 2002 | 2.33 | N (2C5) / 2.55          | HFP + 2C5 <sup>xv</sup>        |
| 9  | 1NL4 | 2.70 | 2003 | 2.30 | N (FTL) / 2.35          | HFP + FTL <sup>xvi</sup>       |
| 10 | 1O5M | 2.30 | 2003 | 2.49 | H <sub>2</sub> O / 2.51 | FPP + SCH66336 <sup>xvii</sup> |

|                                     |      |
|-------------------------------------|------|
| Average Value Zn-O <sub>b</sub> (Å) | 2.51 |
|-------------------------------------|------|

### 5. FTase Product Complex (1 Zinc Thiolate Bond)

|   | PDB Code | Res. (Å) | Year | Distance Zn-O <sub>b</sub> (Å) | Other Possible Zinc Ligands / Distance (Å) | FTase Ligands                     |
|---|----------|----------|------|--------------------------------|--------------------------------------------|-----------------------------------|
| 1 | 1KZO     | 2.20     | 2002 | 2.42                           | H <sub>2</sub> O / 2.67                    | FPP + Far-TKCVIM <sup>xviii</sup> |
| 2 | 1KZP     | 2.10     | 2002 | 2.42                           | S (Far-KCVIM) / 2.66                       | Far-KCVIM                         |
| 3 | 1O1T     | 2.10     | 2003 | 2.49                           | S (Far-KCVIM) / 2.70                       | Far-CVIM                          |

|                                     |      |
|-------------------------------------|------|
| Average Value Zn-O <sub>b</sub> (Å) | 2.44 |
|-------------------------------------|------|

<sup>i</sup> O<sub>b</sub> refers to the Asp297β carboxylate oxygen located at a larger distance from zinc.

<sup>ii</sup> In addition to Asp297β, Cys299β, and His362β.

<sup>iii</sup> FPP – Farnesyl diphosphate, a 15-carbons isoprenoid, the natural substrate of FTase.

<sup>iv</sup> GGPP – Geranylgeranyl diphosphate, a 20-carbons isoprenoid, the natural substrate of GGTase I.

<sup>v</sup> 1NH – a 24-carbons Isoprenoid Analog.

<sup>vi</sup> HFP – α-hydroxyfarnesylphosphonic acid, a 15-carbons FPP analog.

<sup>vii</sup> FII – a 17-carbons FPP analog.

<sup>viii</sup> L-739,750 – a peptidomimetic FTase inhibitor.

<sup>ix</sup> U66 – FTase inhibitor compound 66.

<sup>x</sup> U49 – FTase inhibitor compound 49.

<sup>xi</sup> BNE – FTase inhibitor compound 33A.

<sup>xii</sup> TIN – Aryl tetrahydropyridine inhibitor of FTase.

<sup>xiii</sup> FTH – Aryl tetrahydropyridine inhibitor of FTase.

<sup>xiv</sup> FTI – Aryl tetrahydropyridine inhibitor of FTase.

<sup>xv</sup> 2C5 – Imidazole and Cyanophenyl containing inhibitor of FTase.

<sup>xvi</sup> FTL – Imidazole-containing biphenyl inhibitor of FTase.

<sup>xvii</sup> SCH66336 – Tricyclic FTase Inhibitor.

<sup>xviii</sup> Far-TKCVIM, Far-KCVIM, and Far-CVIM refer to farnesylated peptides at the Cysteine residue.

## Summary

|                       | Number of Zinc-Thiolate Bonds | Average Distance Zn-O <sub>b</sub> (Å) |
|-----------------------|-------------------------------|----------------------------------------|
| FTase Resting State   | 1                             | 2.56                                   |
| FTase Binary Complex  | 1                             | 2.39                                   |
| FTase Ternary Complex | 2                             | 2.54                                   |
| FTase Ternary Complex | 1                             | 2.51                                   |
| FTase Product Complex | 1                             | 2.44                                   |
| All Structures        | -                             | 2.49                                   |

## STATIONARY POINTS

- Smaller Model -

Minimum 1

```
C -0.7134  2.0176 -3.6496
C -0.2176  1.2685 -2.4248
O  1.0058  1.2623 -2.0816
O -1.1482  0.6081 -1.7358
H  1.9361 -2.9304  0.7900
C  0.9265 -3.1140  1.1670
S -0.3411 -2.7216 -0.1911
C  2.0806  2.0952  2.0505
N  1.1801  1.6339  3.0205
C  1.6873  1.5152  0.8589
C  0.2799  0.7993  2.4093
N  0.5670  0.7098  1.1029
Zn -0.4184 -0.4154 -0.2565
O -2.3170 -0.5759  0.9037
H -2.2640 -1.5654  0.8342
H -3.0990 -0.2161  0.4391
H  0.8169 -4.1734  1.4147
H  0.7509 -2.5130  2.0646
H  2.0718  1.6153 -0.1444
```

|   |         |        |         |
|---|---------|--------|---------|
| H | 2.8856  | 2.7736 | 2.2794  |
| H | -0.5453 | 0.3114 | 2.9017  |
| H | 1.1857  | 1.8775 | 4.0019  |
| H | 0.1002  | 2.5895 | -4.1018 |
| H | -1.5363 | 2.6862 | -3.3712 |
| H | -1.1081 | 1.2993 | -4.3786 |

Transition State 1

|    |         |         |         |
|----|---------|---------|---------|
| C  | -0.6384 | 1.9984  | -3.5901 |
| C  | -0.3074 | 1.1644  | -2.3705 |
| O  | 0.8979  | 0.9152  | -2.0143 |
| O  | -1.3186 | 0.6702  | -1.6683 |
| H  | 1.9799  | -2.9557 | 0.5609  |
| C  | 0.9995  | -3.1255 | 1.0136  |
| S  | -0.3618 | -2.6985 | -0.2400 |
| C  | 2.0844  | 2.1131  | 2.0745  |
| N  | 1.0887  | 1.7523  | 2.9926  |
| C  | 1.7548  | 1.4800  | 0.8902  |
| C  | 0.1974  | 0.9242  | 2.3591  |
| N  | 0.5812  | 0.7432  | 1.0880  |
| Zn | -0.3662 | -0.3946 | -0.2842 |
| O  | -2.2452 | -0.5561 | 1.0530  |
| H  | -2.1516 | -1.5397 | 0.9430  |
| H  | -3.0179 | -0.2139 | 0.5596  |
| H  | 0.8909  | -4.1852 | 1.2609  |
| H  | 0.9024  | -2.5285 | 1.9254  |
| H  | 2.2288  | 1.5033  | -0.0779 |
| H  | 2.9027  | 2.7658  | 2.3291  |
| H  | -0.6907 | 0.5022  | 2.8011  |
| H  | 1.0294  | 2.0544  | 3.9558  |
| H  | 0.2659  | 2.4554  | -3.9983 |
| H  | -1.3709 | 2.7707  | -3.3295 |
| H  | -1.0969 | 1.3557  | -4.3521 |

Minimum 2

|    |         |         |         |
|----|---------|---------|---------|
| N  | 1.3136  | 0.0227  | 0.5252  |
| C  | 1.9846  | -0.3173 | 1.7060  |
| C  | 3.3456  | -0.3036 | 1.4651  |
| N  | 3.4884  | 0.0463  | 0.1168  |
| C  | 2.2437  | 0.2354  | -0.4229 |
| Zn | -0.6676 | 0.1395  | 0.1452  |
| O  | -1.0089 | -1.5204 | -1.2800 |
| C  | -1.4106 | -2.2205 | -0.2579 |

|   |         |         |         |
|---|---------|---------|---------|
| O | -1.3855 | -1.6530 | 0.9211  |
| C | -1.9244 | -3.6291 | -0.4210 |
| S | -1.7442 | 2.0733  | -0.3175 |
| C | -0.6076 | 3.3913  | 0.4488  |
| H | -0.7161 | 3.3931  | 1.5365  |
| H | -0.9307 | 4.3565  | 0.0498  |
| H | 0.4371  | 3.2177  | 0.1757  |
| H | 1.4557  | -0.5522 | 2.6153  |
| H | 4.1846  | -0.5078 | 2.1093  |
| H | 2.0023  | 0.4869  | -1.4510 |
| H | 4.3610  | 0.1373  | -0.3862 |
| H | -1.7290 | -4.2129 | 0.4826  |
| H | -1.4699 | -4.1033 | -1.2949 |
| H | -3.0111 | -3.5951 | -0.5750 |
| O | 0.3252  | 0.5638  | -2.6645 |
| H | -0.3089 | 1.2806  | -2.4337 |
| H | -0.1366 | -0.3006 | -2.5733 |

#### Transition State 2

|    |         |         |         |
|----|---------|---------|---------|
| C  | -1.3072 | 2.0602  | -3.2534 |
| C  | -0.7992 | 1.1248  | -2.1848 |
| O  | 0.4444  | 0.7289  | -2.1796 |
| O  | -1.5904 | 0.6599  | -1.2603 |
| H  | 1.9543  | -2.9213 | 1.2311  |
| C  | 0.8814  | -3.1307 | 1.2518  |
| S  | 0.0930  | -2.7398 | -0.4343 |
| C  | 1.9310  | 2.0291  | 2.4147  |
| N  | 0.6206  | 1.8729  | 2.8818  |
| C  | 2.0030  | 1.2885  | 1.2500  |
| C  | -0.0631 | 1.0607  | 2.0159  |
| N  | 0.7580  | 0.6910  | 1.0158  |
| Zn | 0.1822  | -0.4983 | -0.5177 |
| O  | -2.6659 | -0.0245 | 1.1275  |
| H  | -2.8567 | -0.9811 | 1.0884  |
| H  | -2.5143 | 0.3215  | 0.2123  |
| H  | 0.7248  | -4.1985 | 1.4278  |
| H  | 0.4020  | -2.5593 | 2.0516  |
| H  | 2.8361  | 1.1559  | 0.5790  |
| H  | 2.6673  | 2.6284  | 2.9237  |
| H  | -1.1072 | 0.7627  | 2.0843  |
| H  | 0.2305  | 2.2924  | 3.7152  |
| H  | -0.4883 | 2.6627  | -3.6542 |
| H  | -2.1003 | 2.6998  | -2.8555 |
| H  | -1.7308 | 1.4657  | -4.0737 |

Minimum 3

|    |         |         |         |
|----|---------|---------|---------|
| C  | -1.9077 | 1.7145  | -3.0600 |
| C  | -1.1000 | 0.8903  | -2.0901 |
| O  | 0.1844  | 0.7624  | -2.2061 |
| O  | -1.6829 | 0.2544  | -1.0991 |
| H  | 1.4751  | -2.5059 | 1.7883  |
| C  | 1.0529  | -3.2266 | 1.0818  |
| S  | 1.1737  | -2.5894 | -0.7068 |
| C  | 1.7214  | 1.6663  | 2.7791  |
| N  | 0.3502  | 1.9354  | 2.8570  |
| C  | 1.8764  | 0.8433  | 1.6810  |
| C  | -0.2905 | 1.2911  | 1.8305  |
| N  | 0.6200  | 0.6201  | 1.0991  |
| Zn | 0.3154  | -0.5217 | -0.5456 |
| O  | -3.1153 | 1.0803  | 0.9419  |
| H  | -3.9761 | 0.6892  | 1.1723  |
| H  | -2.7621 | 0.7374  | 0.0711  |
| H  | 1.6330  | -4.1527 | 1.1230  |
| H  | 0.0118  | -3.4385 | 1.3402  |
| H  | 2.7750  | 0.4074  | 1.2746  |
| H  | 2.4385  | 2.0647  | 3.4773  |
| H  | -1.3672 | 1.3122  | 1.6584  |
| H  | -0.1072 | 2.5104  | 3.5519  |
| H  | -1.2496 | 2.3051  | -3.7003 |
| H  | -2.5961 | 2.3697  | -2.5147 |
| H  | -2.5125 | 1.0452  | -3.6849 |

- Larger Model -

Minimum 1

|   |         |         |         |
|---|---------|---------|---------|
| N | -2.4843 | -6.3557 | 0.1750  |
| C | -2.2287 | -4.8949 | 0.1737  |
| C | -3.3701 | -4.1932 | 0.9233  |
| O | -4.5426 | -4.2721 | 0.5609  |
| C | -2.1058 | -4.3006 | -1.2353 |
| C | -1.5612 | -2.8643 | -1.2390 |
| O | -1.4922 | -2.1379 | -0.1967 |
| O | -1.1767 | -2.4142 | -2.4314 |
| H | -1.7904 | -6.8111 | -0.3803 |
| H | -3.3885 | -6.5537 | -0.2000 |
| H | -1.2551 | -4.7580 | 0.7118  |
| H | -1.4342 | -4.9064 | -1.8784 |
| H | -3.0868 | -4.2817 | -1.7590 |

|   |         |         |         |
|---|---------|---------|---------|
| N | -3.0448 | -3.4883 | 2.0969  |
| C | -3.9492 | -2.4592 | 2.6428  |
| C | -3.3900 | -1.0361 | 2.6280  |
| O | -3.2890 | -0.3824 | 3.6569  |
| H | -2.0627 | -3.3499 | 2.2905  |
| H | -4.9277 | -2.4587 | 2.1117  |
| H | -4.1647 | -2.7555 | 3.6912  |
| N | -3.1331 | -0.4214 | 1.3640  |
| C | -2.5896 | 0.9711  | 1.3353  |
| C | -3.6808 | 2.0145  | 1.0325  |
| O | -3.4165 | 3.1988  | 0.8551  |
| C | -1.3825 | 1.1112  | 0.4004  |
| S | -1.7634 | 1.2879  | -1.5057 |
| H | -2.7111 | -1.0412 | 0.6777  |
| H | -2.2129 | 1.2371  | 2.3627  |
| H | -0.7114 | 0.2429  | 0.5173  |
| H | -0.8299 | 2.0409  | 0.6418  |
| N | -5.0493 | 1.6454  | 1.1097  |
| C | -6.0804 | 2.4296  | 0.3693  |
| C | -6.3288 | 3.7603  | 1.0834  |
| O | -6.7183 | 4.7388  | 0.4896  |
| C | -7.4203 | 1.6703  | 0.3312  |
| C | -7.2835 | 0.3053  | -0.2608 |
| C | -7.2286 | 0.1395  | -1.6466 |
| C | -7.1886 | -0.8115 | 0.5726  |
| C | -7.0418 | -1.1186 | -2.2014 |
| C | -6.9878 | -2.0764 | 0.0390  |
| C | -6.8973 | -2.2251 | -1.3519 |
| O | -6.6828 | -3.4340 | -1.9522 |
| H | -5.2152 | 0.6614  | 1.0344  |
| H | -5.7319 | 2.6130  | -0.6802 |
| H | -6.1573 | 3.7972  | 2.1711  |
| H | -7.8502 | 1.6007  | 1.3517  |
| H | -8.1442 | 2.2641  | -0.2625 |
| H | -7.3206 | 1.0151  | -2.2998 |
| H | -7.2623 | -0.6934 | 1.6608  |
| H | -6.9936 | -1.2448 | -3.2883 |
| H | -6.8716 | -2.9421 | 0.7050  |
| H | -6.4044 | -4.0442 | -1.2777 |
| N | 2.3947  | -1.5560 | 3.5689  |
| C | 1.8915  | -2.6568 | 2.7067  |
| C | 0.7929  | -3.4117 | 3.4449  |
| O | -0.3226 | -3.5552 | 2.9979  |
| C | 2.9839  | -3.6477 | 2.2810  |
| C | 4.1317  | -2.9359 | 1.5609  |
| O | 4.6193  | -3.3535 | 0.4945  |
| O | 4.6023  | -1.8456 | 2.0518  |
| H | 3.2327  | -1.1965 | 3.1200  |
| H | 2.6490  | -1.9289 | 4.4616  |
| H | 1.4762  | -2.1566 | 1.7967  |
| H | 1.0478  | -3.8481 | 4.4257  |



|   |         |         |         |
|---|---------|---------|---------|
| H | 3.3964  | -4.1811 | 3.1603  |
| H | 2.5489  | -4.4276 | 1.6271  |
| N | 8.7657  | -3.2256 | -1.3799 |
| C | 7.4296  | -2.5824 | -1.3228 |
| C | 6.5406  | -3.2556 | -2.3513 |
| O | 5.5008  | -2.7712 | -2.7545 |
| C | 7.4753  | -1.0491 | -1.5035 |
| O | 8.3534  | -0.4243 | -0.6131 |
| H | 9.2477  | -3.0590 | -0.5226 |
| H | 9.2929  | -2.8344 | -2.1328 |
| H | 6.9750  | -2.8258 | -0.3208 |
| H | 6.8548  | -4.2399 | -2.7365 |
| H | 7.8588  | -0.7603 | -2.4982 |
| H | 6.4551  | -0.6147 | -1.3906 |
| H | 8.0441  | -0.6175 | 0.2776  |
| N | 5.2182  | 5.1185  | 0.6526  |
| C | 3.7009  | 5.1216  | 0.5965  |
| C | 3.2057  | 3.7239  | 1.0270  |
| O | 2.4715  | 3.5684  | 1.9722  |
| C | 3.1785  | 5.5078  | -0.8007 |
| C | 1.6959  | 5.6480  | -0.7502 |
| C | 1.1185  | 6.8626  | -0.3703 |
| C | 0.8752  | 4.5618  | -1.0670 |
| C | -0.2576 | 6.9872  | -0.2738 |
| C | -0.5025 | 4.6562  | -0.9613 |
| C | -1.0720 | 5.8741  | -0.5515 |
| O | -2.4077 | 6.0640  | -0.4195 |
| H | 5.5629  | 5.9930  | 0.3089  |
| H | 5.5850  | 4.3728  | 0.0859  |
| H | 3.3046  | 5.8849  | 1.3249  |
| H | 3.6353  | 6.4675  | -1.1212 |
| H | 3.4727  | 4.7550  | -1.5607 |
| H | 1.7564  | 7.7244  | -0.1445 |
| H | 1.3182  | 3.6140  | -1.3990 |
| H | -0.7099 | 7.9400  | 0.0249  |
| H | -1.1287 | 3.7649  | -1.1843 |
| H | -2.8429 | 5.2183  | -0.4624 |
| N | 3.8165  | 2.6459  | 0.2573  |
| C | 4.0644  | 1.3741  | 1.0080  |
| C | 5.2250  | 1.5603  | 1.9860  |
| O | 5.7830  | 2.6305  | 2.1382  |
| C | 4.4105  | 0.2249  | 0.0646  |
| C | 3.3152  | -0.1976 | -0.8259 |
| N | 3.4403  | -1.3443 | -1.6307 |
| C | 2.0229  | 0.2674  | -1.0451 |
| C | 2.2630  | -1.5384 | -2.2889 |
| N | 1.3826  | -0.5781 | -1.9564 |
| H | 3.3020  | 2.4841  | -0.5875 |
| H | 3.1638  | 1.0765  | 1.6134  |
| H | 5.5351  | 0.6710  | 2.5643  |
| H | 5.3221  | 0.4406  | -0.5418 |

|    |         |         |         |
|----|---------|---------|---------|
| H  | 4.6980  | -0.6687 | 0.7405  |
| H  | 4.2820  | -1.9373 | -1.7126 |
| H  | 1.4962  | 1.1012  | -0.6137 |
| H  | 2.0779  | -2.3564 | -2.9654 |
| Zn | -0.5899 | -0.4873 | -2.3779 |
| O  | -0.8076 | -0.9035 | -4.4563 |
| H  | -1.1819 | -1.8024 | -4.2866 |
| H  | -1.3274 | -0.3800 | -5.0925 |
| O  | 7.1463  | -1.1237 | 1.7282  |
| H  | 6.2119  | -1.3840 | 1.6118  |
| H  | 7.5529  | -1.7472 | 2.3183  |
| H  | 5.5161  | 4.9928  | 1.6024  |

Minimum 3

|   |         |         |         |
|---|---------|---------|---------|
| N | -2.1531 | -6.4635 | 0.1160  |
| C | -1.9094 | -5.0027 | 0.0416  |
| C | -3.1059 | -4.2872 | 0.6889  |
| O | -4.2388 | -4.3294 | 0.2113  |
| C | -1.7068 | -4.4973 | -1.3936 |
| C | -1.2094 | -3.0605 | -1.4620 |
| O | -1.0338 | -2.3081 | -0.4395 |
| O | -0.9700 | -2.5388 | -2.6653 |
| H | -1.4010 | -6.9469 | -0.3283 |
| H | -3.0119 | -6.6982 | -0.3364 |
| H | -0.9712 | -4.8186 | 0.6274  |
| H | -0.9735 | -5.1233 | -1.9453 |
| H | -2.6448 | -4.5461 | -1.9867 |
| N | -2.8859 | -3.6161 | 1.9013  |
| C | -3.8767 | -2.6744 | 2.4563  |
| C | -3.3561 | -1.2384 | 2.5488  |
| O | -2.8642 | -0.7832 | 3.5686  |
| H | -1.9327 | -3.5015 | 2.2187  |
| H | -4.8267 | -2.7039 | 1.8773  |
| H | -4.1244 | -3.0322 | 3.4778  |
| N | -3.5988 | -0.3781 | 1.4313  |
| C | -3.0296 | 0.9986  | 1.4035  |
| C | -4.1084 | 2.0299  | 1.0278  |
| O | -3.8411 | 3.1602  | 0.6421  |
| C | -1.7628 | 1.1087  | 0.5467  |
| S | -2.0223 | 1.0184  | -1.3877 |
| H | -3.5615 | -0.8354 | 0.5431  |
| H | -2.7242 | 1.2725  | 2.4510  |
| H | -1.0493 | 0.3124  | 0.8280  |
| H | -1.2815 | 2.0920  | 0.7098  |
| N | -5.4737 | 1.7291  | 1.2956  |
| C | -6.5446 | 2.3990  | 0.5006  |
| C | -6.9364 | 3.7052  | 1.1949  |

|   |         |         |         |
|---|---------|---------|---------|
| O | -7.5231 | 4.5874  | 0.6129  |
| C | -7.7959 | 1.5085  | 0.3969  |
| C | -7.4957 | 0.1955  | -0.2506 |
| C | -7.3732 | 0.1114  | -1.6403 |
| C | -7.3208 | -0.9500 | 0.5277  |
| C | -7.0501 | -1.0912 | -2.2505 |
| C | -6.9796 | -2.1601 | -0.0613 |
| C | -6.8346 | -2.2262 | -1.4538 |
| O | -6.5037 | -3.3770 | -2.1099 |
| H | -5.6639 | 0.7553  | 1.4242  |
| H | -6.1676 | 2.6198  | -0.5321 |
| H | -6.6734 | 3.8198  | 2.2589  |
| H | -8.2408 | 1.3490  | 1.4006  |
| H | -8.5653 | 2.0477  | -0.1920 |
| H | -7.5235 | 1.0094  | -2.2512 |
| H | -7.4502 | -0.9011 | 1.6159  |
| H | -6.9494 | -1.1526 | -3.3399 |
| H | -6.8085 | -3.0474 | 0.5623  |
| H | -6.1814 | -3.9970 | -1.4651 |
| N | 2.3335  | -1.4546 | 3.6499  |
| C | 1.9345  | -2.5823 | 2.7682  |
| C | 0.8610  | -3.4112 | 3.4620  |
| O | -0.2107 | -3.6611 | 2.9560  |
| C | 3.1050  | -3.4961 | 2.3794  |
| C | 4.2296  | -2.7072 | 1.7027  |
| O | 4.7893  | -3.0940 | 0.6615  |
| O | 4.6066  | -1.5868 | 2.2096  |
| H | 3.1600  | -1.0381 | 3.2297  |
| H | 2.5829  | -1.8145 | 4.5494  |
| H | 1.5216  | -2.1060 | 1.8446  |
| H | 1.0910  | -3.8038 | 4.4671  |
| H | 3.5203  | -4.0052 | 3.2716  |
| H | 2.7471  | -4.2998 | 1.7078  |
| N | 8.9358  | -2.8716 | -1.1089 |
| C | 7.6038  | -2.2185 | -1.1383 |
| C | 6.7920  | -2.8590 | -2.2487 |
| O | 5.7995  | -2.3475 | -2.7304 |
| C | 7.6727  | -0.6828 | -1.2831 |
| O | 8.4732  | -0.0785 | -0.3101 |
| H | 9.3482  | -2.7373 | -0.2106 |
| H | 9.5247  | -2.4618 | -1.8039 |
| H | 7.0735  | -2.4794 | -0.1783 |
| H | 7.1199  | -3.8429 | -2.6231 |
| H | 8.1401  | -0.3762 | -2.2358 |
| H | 6.6470  | -0.2484 | -1.2511 |
| H | 8.0978  | -0.2963 | 0.5489  |
| N | 4.9843  | 5.4303  | 0.3798  |
| C | 3.4698  | 5.3223  | 0.3456  |
| C | 3.0813  | 3.9336  | 0.8979  |
| O | 2.3743  | 3.8061  | 1.8680  |
| C | 2.9124  | 5.5527  | -1.0721 |

|    |         |         |         |
|----|---------|---------|---------|
| C  | 1.4246  | 5.6209  | -1.0195 |
| C  | 0.7891  | 6.8341  | -0.7406 |
| C  | 0.6576  | 4.4751  | -1.2478 |
| C  | -0.5920 | 6.9035  | -0.6665 |
| C  | -0.7248 | 4.5152  | -1.1629 |
| C  | -1.3527 | 5.7369  | -0.8656 |
| O  | -2.6975 | 5.8797  | -0.7699 |
| H  | 5.2628  | 6.2985  | -0.0333 |
| H  | 5.3979  | 4.6714  | -0.1348 |
| H  | 3.0261  | 6.1144  | 1.0133  |
| H  | 3.3139  | 6.5025  | -1.4840 |
| H  | 3.2400  | 4.7517  | -1.7664 |
| H  | 1.3850  | 7.7396  | -0.5806 |
| H  | 1.1486  | 3.5259  | -1.4963 |
| H  | -1.0901 | 7.8558  | -0.4500 |
| H  | -1.3114 | 3.5852  | -1.3195 |
| H  | -3.0994 | 5.0170  | -0.7864 |
| N  | 3.7544  | 2.8427  | 0.2037  |
| C  | 4.1093  | 1.6538  | 1.0431  |
| C  | 5.3042  | 1.9805  | 1.9371  |
| O  | 5.7844  | 3.0966  | 1.9992  |
| C  | 4.4691  | 0.4478  | 0.1781  |
| C  | 3.3852  | -0.0128 | -0.7055 |
| N  | 3.5879  | -1.0264 | -1.6607 |
| C  | 2.0328  | 0.2903  | -0.7708 |
| C  | 2.3985  | -1.3066 | -2.2666 |
| N  | 1.4334  | -0.5217 | -1.7433 |
| H  | 3.2356  | 2.5778  | -0.6126 |
| H  | 3.2563  | 1.3633  | 1.7171  |
| H  | 5.7160  | 1.1518  | 2.5405  |
| H  | 5.3955  | 0.6293  | -0.4166 |
| H  | 4.7326  | -0.4153 | 0.9038  |
| H  | 4.4819  | -1.5019 | -1.8553 |
| H  | 1.4494  | 0.9767  | -0.1804 |
| H  | 2.2439  | -2.0396 | -3.0551 |
| Zn | -0.5423 | -0.6558 | -1.9219 |
| O  | 7.1426  | -0.8062 | 1.9586  |
| H  | 6.2146  | -1.0777 | 1.8151  |
| H  | 7.5375  | -1.4236 | 2.5628  |
| H  | 5.2990  | 5.3980  | 1.3319  |
| O  | 1.0800  | -3.0367 | -4.2983 |
| H  | 0.9686  | -3.3042 | -5.2275 |
| H  | 0.2124  | -2.9881 | -3.8121 |
